S6 Fig

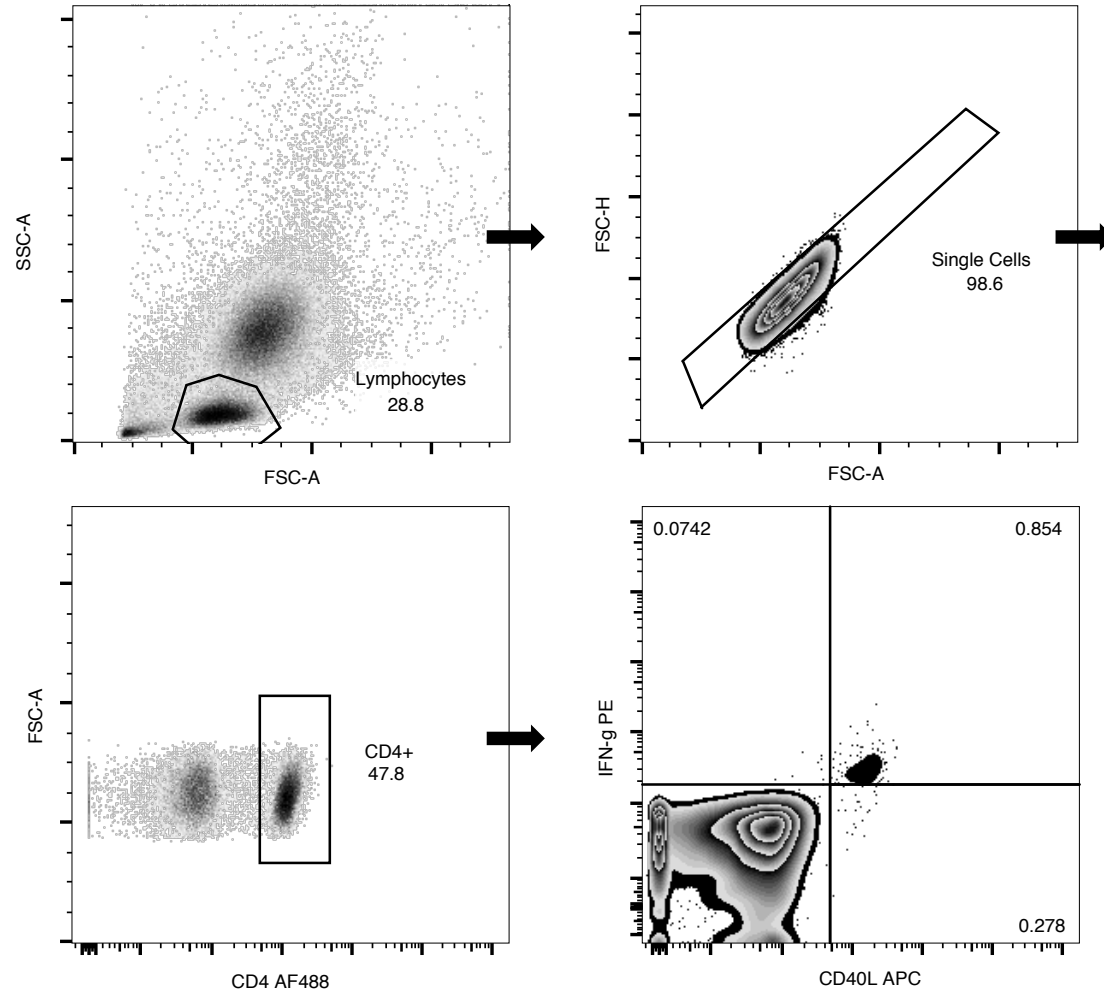

Source: https://storage.googleapis.com/plos-corpus-prod/10.1371/journal.ppat.1006425/2/ppat.1006425.s007.pdf
